# Supplementary material for: Taking stock: protocol for evaluating a family planning supply chain intervention in Senegal
Source: Springer Nature journal article supplement (doi:10.1186/s12978-016-0163-7), 2016-04-21

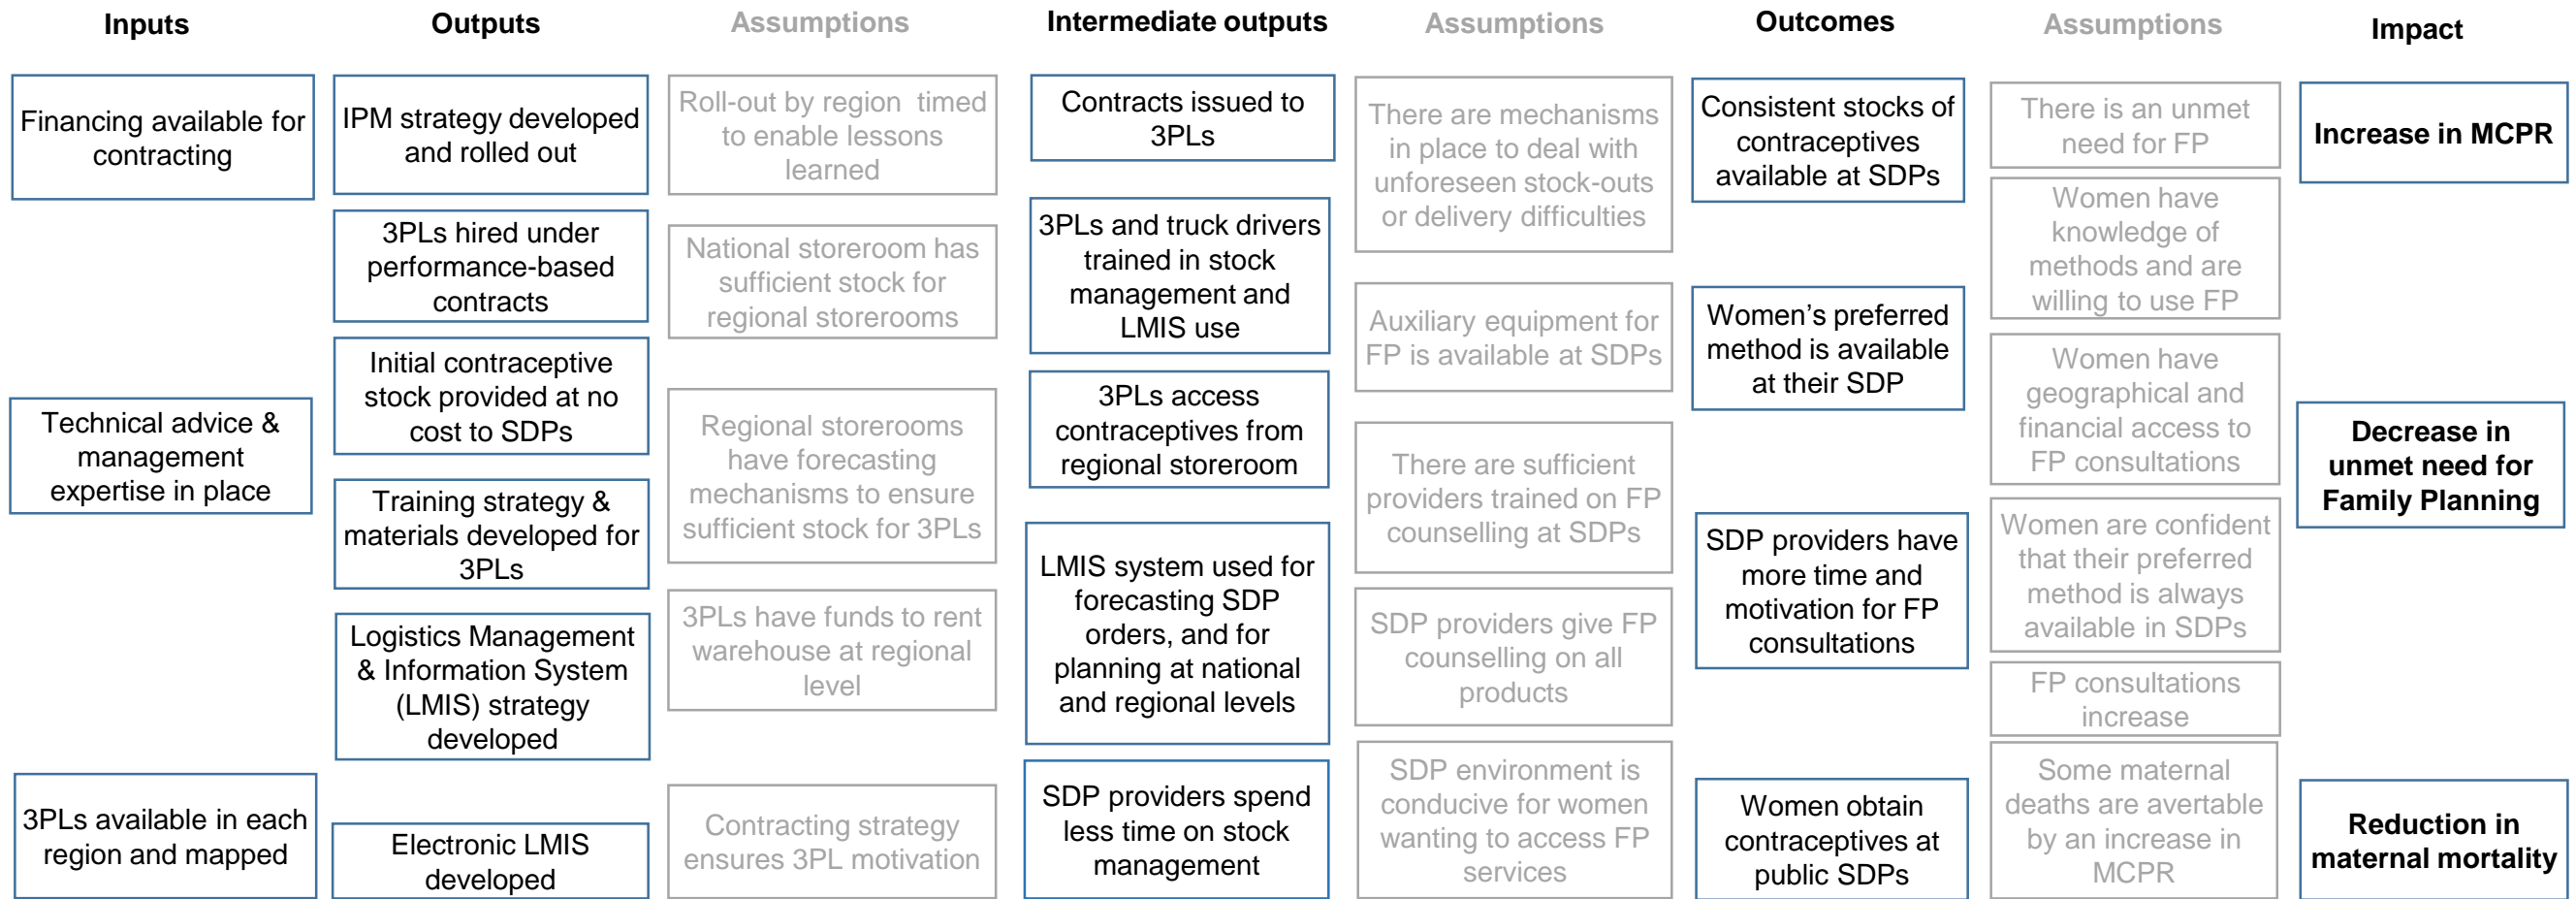

Supplement: MOESM1 [file 10043616]
